# Supplementary material for: Analysis of Severe Hypoglycemia Among Adults With Type 2 Diabetes and Nonalcoholic Fatty Liver Disease
Source: PubMed Central journal article supplement (PMC8867244; doi:10.1001/jamanetworkopen.2022.0262), 2022-02-23
Supplement: jamanetwopen-e220262-s001.pdf [file jamanetwopen-e220262-s001.pdf]

## Supplemental Online Content

Lee JY, Kim YE, Han K, et al. Analysis of severe hypoglycemia among adults with type 2 diabetes and nonalcoholic fatty liver disease. *JAMA Netw Open*. 2022;5(2):e220262. doi:10.1001/jamanetworkopen.2022.0262

**eFigure 1.** Study Flowchart With Data From the Database of National Health Insurance Service

**eFigure 2.** Number (Multiplied by 100 ) of Cases of Severe Hypoglycemia per Person During the Follow-up Period According To Fatty Liver Index

**eTable 1.** Association Between Traditional Risk Factors and Severe Hypoglycemia Events

**eTable 2.** Cutoff Values of Fatty Liver Index Deciles

**eTable 3.** Association Between Fatty Liver Index and Incident Severe Hypoglycemia Events in Patients With Newly Diagnosed Type 2 Diabetes

**eTable 4.** Fine-Gray Competing Risk Model for Estimating the Subdistribution Hazard Ratio

**eTable 5.** Risk of Severe Hypoglycemia by Fatty Liver Index Components

**eTable 6.** Adjusted Hazard Ratios for Severe Hypoglycemia in Groups With FLI 60 or Greater and Between 30 and 60 vs Group With FLI Less Than 30, in Detailed Subgroups

**eTable 7.** Association Between Fatty Liver Index, AST/ALT Ratio, and Incident Severe Hypoglycemia Events

This supplemental material has been provided by the authors to give readers additional information about their work.

**eFigure 1.** Study Flowchart With Data From the Database of National Health Insurance Service

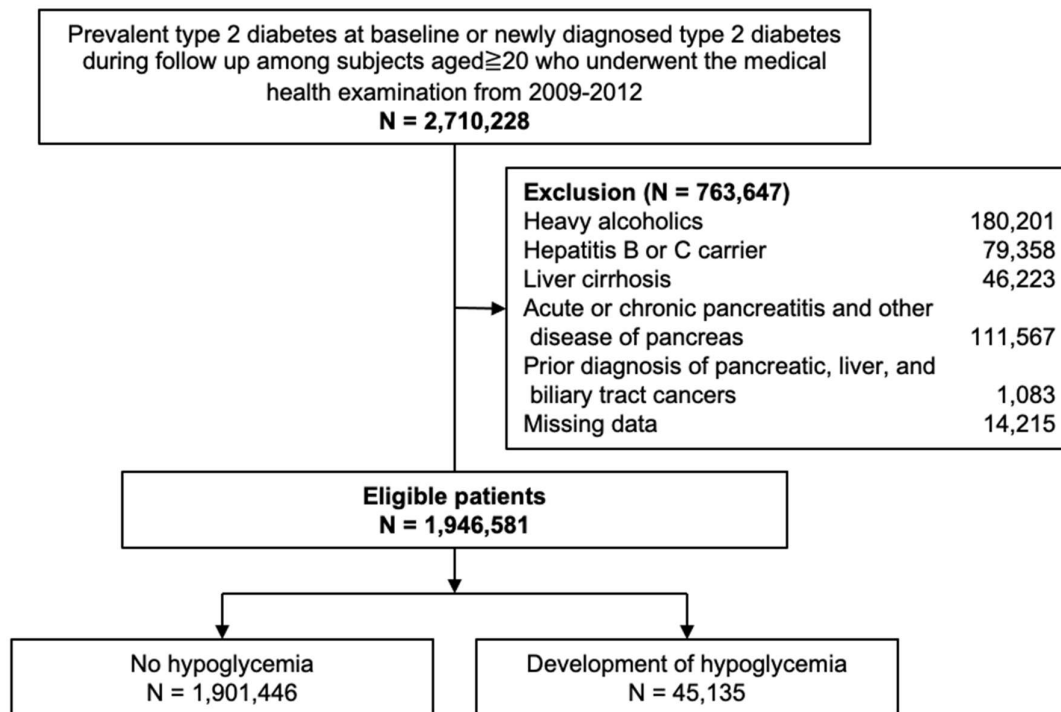

**eFigure 2.** Number (Multiplied by 100 ) of Cases of Severe Hypoglycemia per Person During the Follow-up Period According To Fatty Liver Index

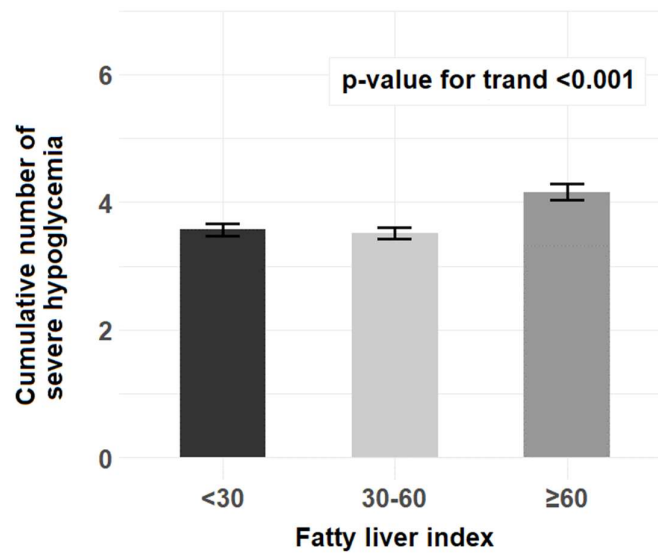

Least-square means and standard errors were adjusted for age, sex, smoking and alcohol habits, exercise, body mass index, severe hypoglycemia in previous 3 years, insulin, sulfonylurea or glinides use, history of hypertension, chronic kidney disease, cardiovascular disease, and follow-up duration. Analyses were conducted in a repeatedly extracted database based on the same inclusion/exclusion criteria during the revision.

**eTable 1.** Association Between Traditional Risk Factors and Severe Hypoglycemia Events

| Group                                              | Incident cases, n | Person-years, n | Incident rate per 1000 p-y | aHR (95% CI)     |
|----------------------------------------------------|-------------------|-----------------|----------------------------|------------------|
| <b>Age, y</b>                                      |                   |                 |                            |                  |
| 20-39                                              | 501               | 761,866         | 0.7                        | 0.75 (0.68-0.82) |
| 40-59                                              | 7259              | 4,522,871       | 1.6                        | Ref.             |
| 60-69                                              | 13,544            | 2,666,211       | 5.1                        | 2.01 (1.95-2.07) |
| 70-79                                              | 19,612            | 1,603,974       | 12.2                       | 3.76 (3.65-6.88) |
| ≥80                                                | 4132              | 206,911         | 20.0                       | 5.43 (5.20-5.67) |
| <b>Sex</b>                                         |                   |                 |                            |                  |
| Male                                               | 19,887            | 5,557,185       | 3.6                        | Ref.             |
| Female                                             | 25,161            | 4,204,647       | 6.0                        | 1.04 (1.01-1.06) |
| <b>Insulin use</b>                                 |                   |                 |                            |                  |
| No                                                 | 32,390            | 9,072,352       | 3.6                        | Ref.             |
| Yes                                                | 12,658            | 689,480         | 18.4                       | 3.07 (3.00-3.14) |
| <b>Sulfonylurea/glinides use</b>                   |                   |                 |                            |                  |
| No                                                 | 10,260            | 5,551,866       | 1.8                        | Ref.             |
| Yes                                                | 34,788            | 4,209,966       | 8.3                        | 1.87 (1.74-2.01) |
| <b>Severe hypoglycemia within previous 3 years</b> |                   |                 |                            |                  |
| No                                                 | 41,535            | 9,703,353       | 4.3                        | Ref.             |
| Yes                                                | 3513              | 58,479          | 60.1                       | 4.02 (3.87-4.17) |
| <b>Hypertension</b>                                |                   |                 |                            |                  |
| No                                                 | 10,588            | 4,327,682       | 2.4                        | Ref.             |
| Yes                                                | 34,460            | 5,434,150       | 6.3                        | 1.30 (1.27-1.33) |
| <b>Chronic kidney disease</b>                      |                   |                 |                            |                  |
| No                                                 | 29,494            | 8,630,239       | 3.4                        | Ref.             |
| Yes                                                | 15,450            | 1,123,179       | 13.8                       | 1.89 (1.85-1.93) |
| <b>Cardiovascular disease</b>                      |                   |                 |                            |                  |
| No                                                 | 34,295            | 7,123,257       | 4.8                        | Ref.             |
| Yes                                                | 6294              | 636,874         | 9.9                        | 1.12 (1.09-1.15) |

Adjusted hazard ratios (aHRs) and 95% CIs were adjusted for age, sex, smoking and alcohol habits, exercise, body mass index, severe hypoglycemia within previous 3 years, insulin, sulfonylurea or glinides use, history of hypertension, chronic kidney disease, and cardiovascular disease

**eTable 2.** Cutoff Values of Fatty Liver Index Deciles

| <b>Deciles of FLI</b> | <b>Male</b> | <b>Female</b> |
|-----------------------|-------------|---------------|
| D1                    | <12.3       | <7.1          |
| D2                    | 12.3-20.4   | 7.1-12.1      |
| D3                    | 20.4-28.5   | 12.1-17.4     |
| D4                    | 28.5-36.7   | 17.4-23.1     |
| D5                    | 36.7-45.2   | 23.1-29.5     |
| D6                    | 45.2-54.0   | 29.5-36.8     |
| D7                    | 54.0-63.2   | 36.8-45.6     |
| D8                    | 63.2-73.0   | 45.6-56.2     |
| D9                    | 73.0-83.5   | 56.2-70.4     |
| D10                   | ≥83.5       | ≥70.4         |

FLI, fatty liver index.

**eTable 3.** Association Between Fatty Liver Index and Incident Severe Hypoglycemia Events in Patients With Newly Diagnosed Type 2 Diabetes

| Group (Fatty liver index) | Incident cases, n | Person-years, n | Incident rate per 1000 p-y | Model 1                           | Model 2                           | Model 3                            |
|---------------------------|-------------------|-----------------|----------------------------|-----------------------------------|-----------------------------------|------------------------------------|
| <b>Overall</b>            |                   |                 |                            |                                   |                                   |                                    |
| <30                       | 1713              | 1,473,352       | 1.2                        | Ref.                              | Ref.                              | Ref.                               |
| 30-59                     | 1335              | 1,316,490       | 1.0                        | <b>0.87</b><br><b>(0.81-0.94)</b> | <b>1.34</b><br><b>(1.24-1.46)</b> | <b>1.18</b><br><b>(1.07-1.30)</b>  |
| ≥60                       | 1185              | 1,240,595       | 1.0                        | <b>0.82</b><br><b>(0.76-0.89)</b> | <b>2.27</b><br><b>(2.05-2.51)</b> | <b>1.88</b><br><b>(1.67, 2.11)</b> |

Model 1 was unadjusted. Model 2 was adjusted for age, sex, smoking and alcohol habits, exercise, and body mass index. Model 3 further adjusted for severe hypoglycemia within previous 3 years, insulin, sulfonylurea or glinides use, history of hypertension, chronic kidney disease, and cardiovascular disease. Values with statistical significance are printed in bold. Analyses were conducted in a repeatedly extracted database based on the same inclusion/exclusion criteria during the revision.

**eTable 4.** Fine-Gray Competing Risk Model for Estimating the Subdistribution Hazard Ratio

| Group (Fatty liver index)                                                                                                                                                                                                                                                                                                                                                                                                                                                                              | Model 1                           | Model 2                           | Model 3                           |
|--------------------------------------------------------------------------------------------------------------------------------------------------------------------------------------------------------------------------------------------------------------------------------------------------------------------------------------------------------------------------------------------------------------------------------------------------------------------------------------------------------|-----------------------------------|-----------------------------------|-----------------------------------|
| Overall                                                                                                                                                                                                                                                                                                                                                                                                                                                                                                |                                   |                                   |                                   |
| <30                                                                                                                                                                                                                                                                                                                                                                                                                                                                                                    | Ref.                              | Ref.                              | Ref.                              |
| 30-59                                                                                                                                                                                                                                                                                                                                                                                                                                                                                                  | <b>0.77</b><br><b>(0.75-0.79)</b> | 1.02<br>(1.00-1.05)               | 0.97<br>(0.95-1.00)               |
| ≥60                                                                                                                                                                                                                                                                                                                                                                                                                                                                                                    | <b>0.58</b><br><b>(0.57-0.60)</b> | <b>1.22</b><br><b>(1.18-1.27)</b> | <b>1.16</b><br><b>(1.12-1.20)</b> |
| <p>Model 1 was unadjusted. Model 2 was adjusted for age, sex, smoking and alcohol habits, exercise and BMI. Model 3 further adjusted for severe hypoglycemia within previous 3 years, insulin, sulfonylurea or glinides use, history of hypertension, chronic kidney disease, and cardiovascular disease. Values with statistical significance are printed in bold. Analyses were conducted in a repeatedly extracted database based on the same inclusion/exclusion criteria during the revision.</p> |                                   |                                   |                                   |

**eTable 5.** Risk of Severe Hypoglycemia by Fatty Liver Index Components

| Group                                    | Incident cases, n | Person-years, n | Incident rate per 1000p-y | aHR (95% CI)     |
|------------------------------------------|-------------------|-----------------|---------------------------|------------------|
| <b>Gamma GT Quartile</b>                 |                   |                 |                           |                  |
| 1                                        | 15,472            | 2,533,735       | 6.1                       | Ref.             |
| 2                                        | 10,950            | 2,366,361       | 4.6                       | 0.91 (0.89-0.93) |
| 3                                        | 9736              | 2,448,823       | 4.0                       | 0.91 (0.88-0.93) |
| 4                                        | 8977              | 2,413,505       | 3.7                       | 1.05 (1.02-1.08) |
| <b>Waist circumference Quartile</b>      |                   |                 |                           |                  |
| 1                                        | 11,347            | 2,368,339       | 4.8                       | Ref.             |
| 2                                        | 10,872            | 2,515,384       | 4.3                       | 0.89 (0.86-0.92) |
| 3                                        | 10,671            | 2,381,082       | 4.5                       | 0.92 (0.89-0.95) |
| 4                                        | 12,245            | 2,497,619       | 4.9                       | 1.10 (1.05-1.14) |
| <b>Body mass index, kg/m<sup>2</sup></b> |                   |                 |                           |                  |
| <18.5                                    | 1646              | 139,950         | 11.8                      | 1.71 (1.62-1.80) |
| 18.5-22.9                                | 15,291            | 2,453,462       | 6.2                       | Ref.             |
| 23-24.9                                  | 11,120            | 2,486,748       | 4.5                       | 0.75 (0.73-0.77) |
| 25-29.9                                  | 14,624            | 3,960,684       | 3.7                       | 0.65 (0.64-0.67) |
| ≥30                                      | 2454              | 721,580         | 3.4                       | 0.68 (0.65-0.71) |
| <b>Triglyceride, mg/dL</b>               |                   |                 |                           |                  |
| <150                                     | 25,704            | 5,177,760       | 5.0                       | Ref.             |
| ≥150                                     | 19,431            | 4,584,664       | 4.2                       | 1.00 (0.98-1.02) |

Adjusted hazard ratios (aHRs) and 95% CIs were adjusted for age, sex, smoking and alcohol habits, exercise, body mass index, prior history of severe hypoglycemia within the 3 years, insulin or sulfonylurea or glinides use, history of hypertension, chronic kidney disease, and cardiovascular disease.



**eTable 6.** Adjusted Hazard Ratios for Severe Hypoglycemia in Groups With FLI 60 or Greater and Between 30 and 60 vs Group With FLI Less Than 30, in Detailed Subgroups

| Group                                    | FLI <30 (ref.) | 30 ≤ FLI <60     | FLI ≥60          | p-value for interaction |
|------------------------------------------|----------------|------------------|------------------|-------------------------|
| <b>Age, y</b>                            |                |                  |                  |                         |
| <60                                      | Ref.           | 0.90 (0.84-0.96) | 1.17 (1.08-1.28) | <b>&lt;0.001</b>        |
| ≥60                                      | Ref.           | 1.02 (0.99-1.04) | 1.22 (1.17-1.27) |                         |
| <b>Body mass index, kg/m<sup>2</sup></b> |                |                  |                  |                         |
| <18.5                                    | Ref.           | 1.17 (0.87-1.55) | 1.71 (1.02-2.88) | <b>&lt;0.001</b>        |
| 18.5-23                                  | Ref.           | 1.07 (1.02-1.12) | 1.31 (1.18-1.45) |                         |
| 23-25                                    | Ref.           | 1.02 (0.98-1.07) | 1.20 (1.12-1.29) |                         |
| ≥25                                      | Ref.           | 0.94 (0.90-0.99) | 1.06 (1.01-1.12) |                         |
| <b>Chronic kidney disease</b>            |                |                  |                  |                         |
| No                                       | Ref.           | 1.01 (0.98-1.04) | 1.28 (1.22-1.33) | 0.076                   |
| Yes                                      | Ref.           | 0.97 (0.92-1.01) | 1.07 (1.01-1.13) |                         |
| <b>Cardiovascular disease</b>            |                |                  |                  |                         |
| No                                       | Ref.           | 1.00 (0.97-1.02) | 1.20 (1.15-1.24) | <b>&lt;0.001</b>        |
| Yes                                      | Ref.           | 0.97 (0.91-1.03) | 1.17 (1.07-1.28) |                         |
| <b>Insulin</b>                           |                |                  |                  |                         |
| No                                       | Ref.           | 0.99 (0.96-1.01) | 1.30 (1.25-1.36) | <b>0.006</b>            |
| Yes                                      | Ref.           | 1.01 (0.95-1.06) | 1.13 (1.05-1.21) |                         |
| <b>Sulfonylurea/Glinides</b>             |                |                  |                  |                         |
| No                                       | Ref.           | 1.04 (1.01-1.07) | 1.19 (1.11-1.29) | <b>&lt;0.001</b>        |
| Yes                                      | Ref.           | 0.94 (0.90-0.99) | 1.25 (1.21-1.30) |                         |

Fully adjusted for age, sex, smoking and alcohol habits, exercise, body mass index, prior history of severe hypoglycemia within the 3 years, insulin or sulfonylurea or glinides use, history of hypertension, chronic kidney disease, and cardiovascular disease. Values with statistical significance are printed in bold.

**eTable 7.** Association Between Fatty Liver Index, AST/ALT Ratio, and Incident Severe Hypoglycemia Events

| AST/ALT ratio | Group (Fatty liver index) | Incident cases, n | Person-years, n | Incident rate per 1000 p-y | Model 1                           | Model 2                           | Model 3                           |
|---------------|---------------------------|-------------------|-----------------|----------------------------|-----------------------------------|-----------------------------------|-----------------------------------|
| < 0.8         | < 30                      | 2529              | 550000          | 4.6                        | Ref.                              | Ref.                              | Ref.                              |
|               | 30 - 59                   | 2554              | 947503          | 2.7                        | <b>0.59</b><br><b>(0.56-0.62)</b> | <b>0.81</b><br><b>(0.77-0.86)</b> | <b>0.86</b><br><b>(0.81-0.91)</b> |
|               | ≥ 60                      | 1955              | 1082272         | 1.8                        | <b>0.40</b><br><b>(0.37-0.42)</b> | <b>0.91</b><br><b>(0.86-0.97)</b> | 0.99<br>(0.92-1.06)               |
| ≥ 0.8         | < 30                      | 19839             | 3309185         | 6.0                        | <b>1.31</b><br><b>(1.25-1.36)</b> | <b>0.93</b><br><b>(0.89-0.97)</b> | <b>1.05</b><br><b>(1.01-1.10)</b> |
|               | 30 - 59                   | 11857             | 2312437         | 5.1                        | <b>1.12</b><br><b>(1.07-1.17)</b> | 1.01<br>(0.97-1.05)               | <b>1.07</b><br><b>(1.02-1.12)</b> |
|               | ≥ 60                      | 6194              | 1366780         | 4.5                        | 0.99<br>(0.94-1.04)               | <b>1.32</b><br><b>(1.25-1.39)</b> | <b>1.38</b><br><b>(1.31-1.45)</b> |

Model 1 was unadjusted. Model 2 was adjusted for age, sex, smoking and alcohol habits, exercise and BMI Model 3 further adjusted for severe hypoglycemia within previous 3 years, insulin, sulfonylurea or glinides use, history of hypertension, chronic kidney disease, and cardiovascular disease. Values with statistical significance are printed in bold. Analyses were conducted in a repeatedly extracted database based on the same inclusion/exclusion criteria during the revision.
